# Supplementary material for: Galf-Specific Neolectins: Towards Promising Diagnostic Tools
Source: MDPI journal article supplement (doi:10.3390/ijms25094826), 2024-04-28
Supplement: s1 [file s1]

## Supplemental material

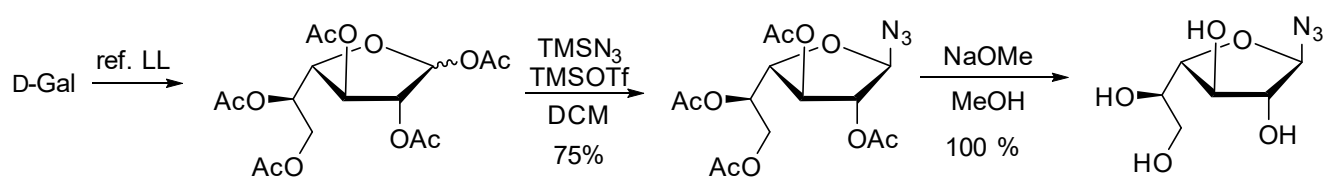

**Figure S1.** Schematic representation of synthetic pathway to Gal $\beta$ -N<sub>3</sub> [49].

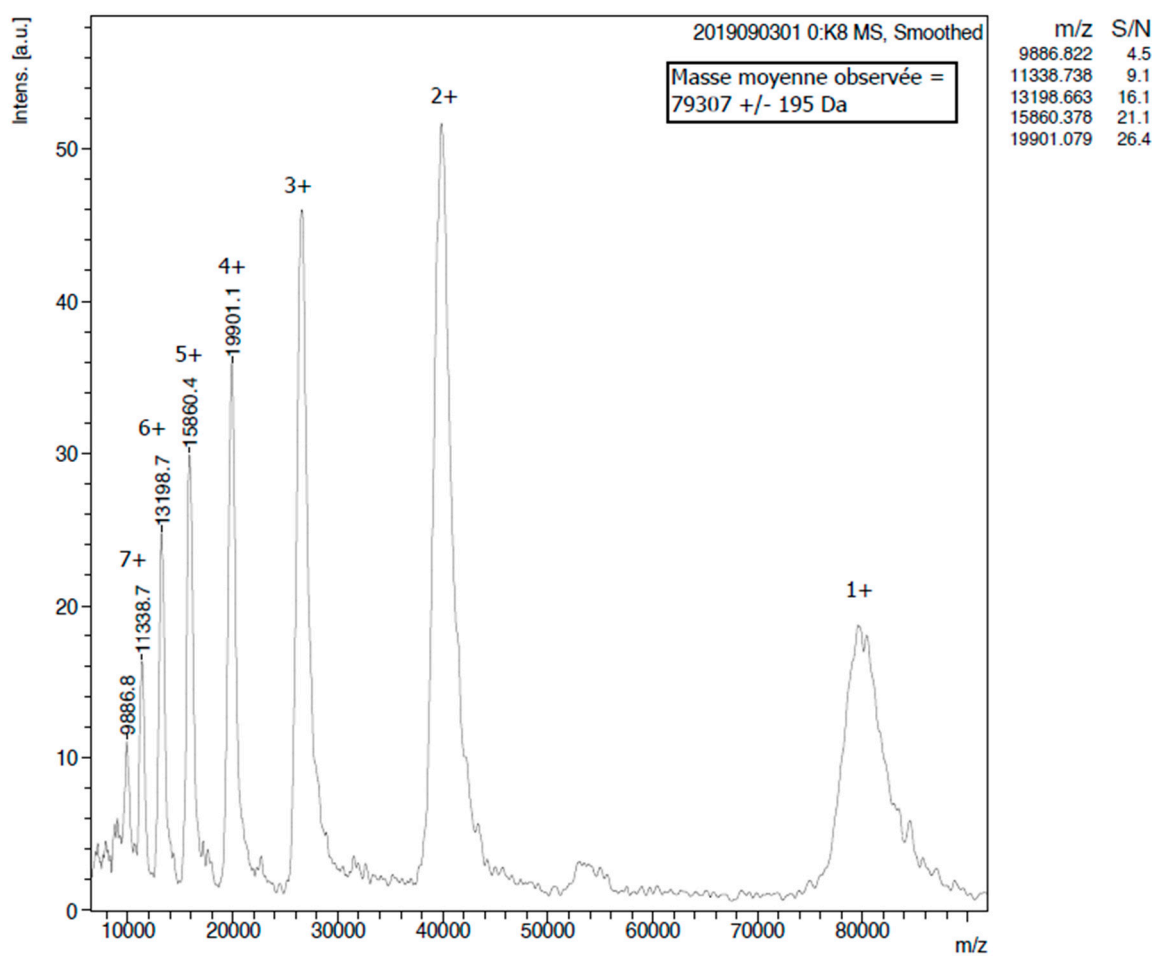

**Figure S2A.** MALDI-TOF result of Gal/NGP. Number of Gal $\beta$ -units was calculated as follow $\bar{s}$ :  $(\text{MW}_{\text{Gal/NGP}} - \text{MW}_{\text{BSA-alkyne}}) / \text{MW}_{\text{Gal/N}_3}$ . MW = Molecular weight. According to this formula, the number of Gal on Gal/NGP is equal to 35.

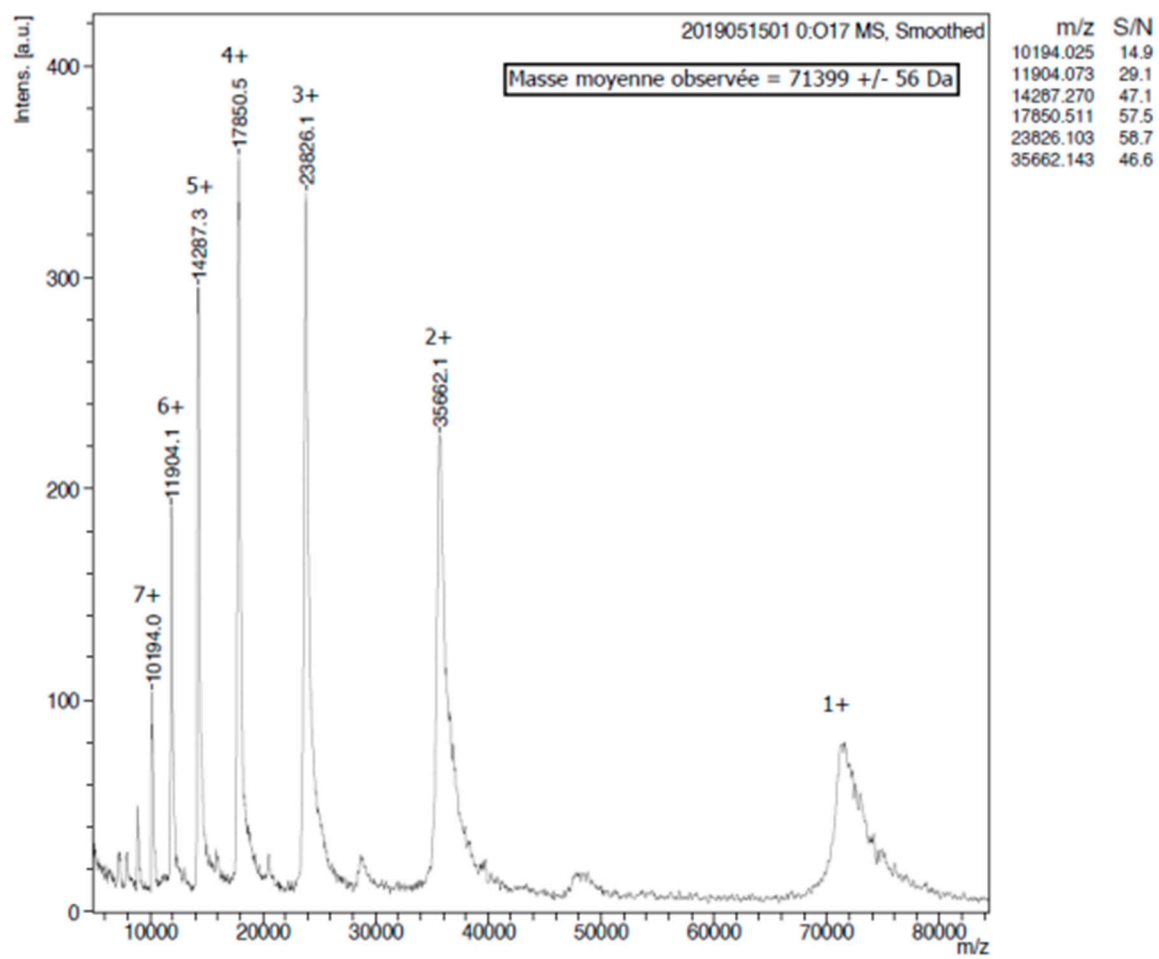

Figure S2B. MALDI-TOF result of BSA-alkyne.

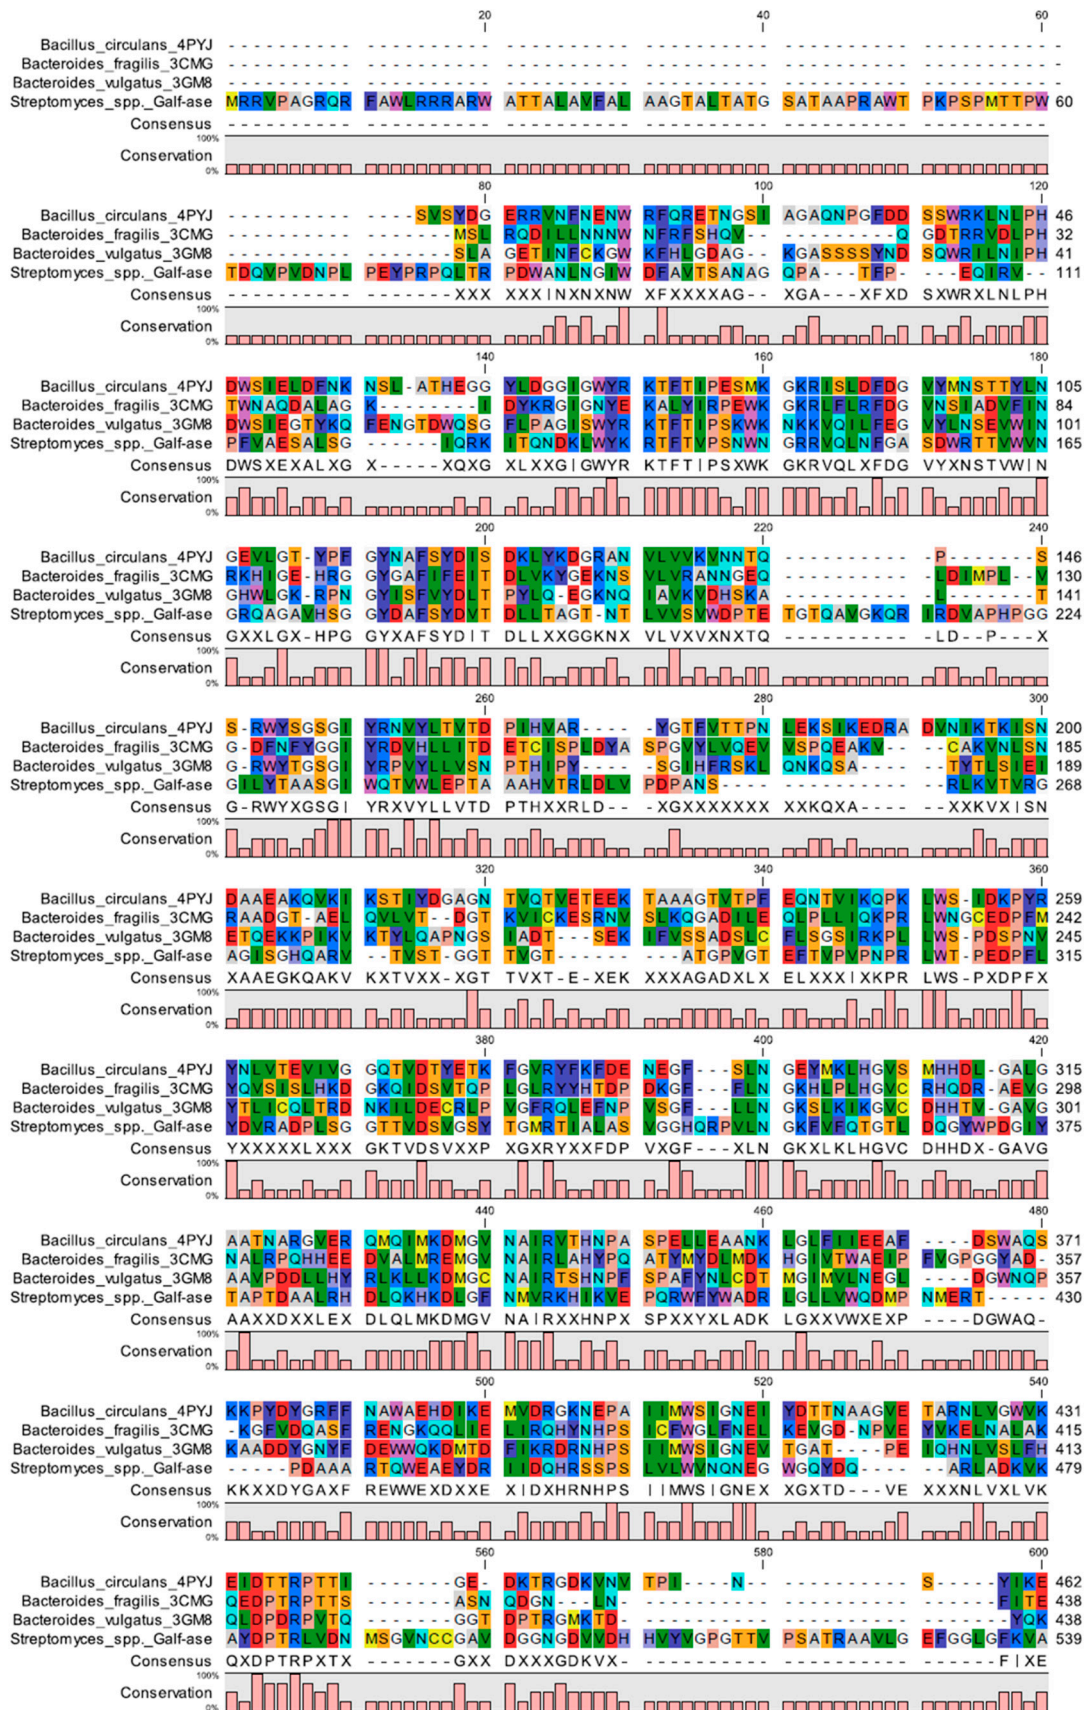



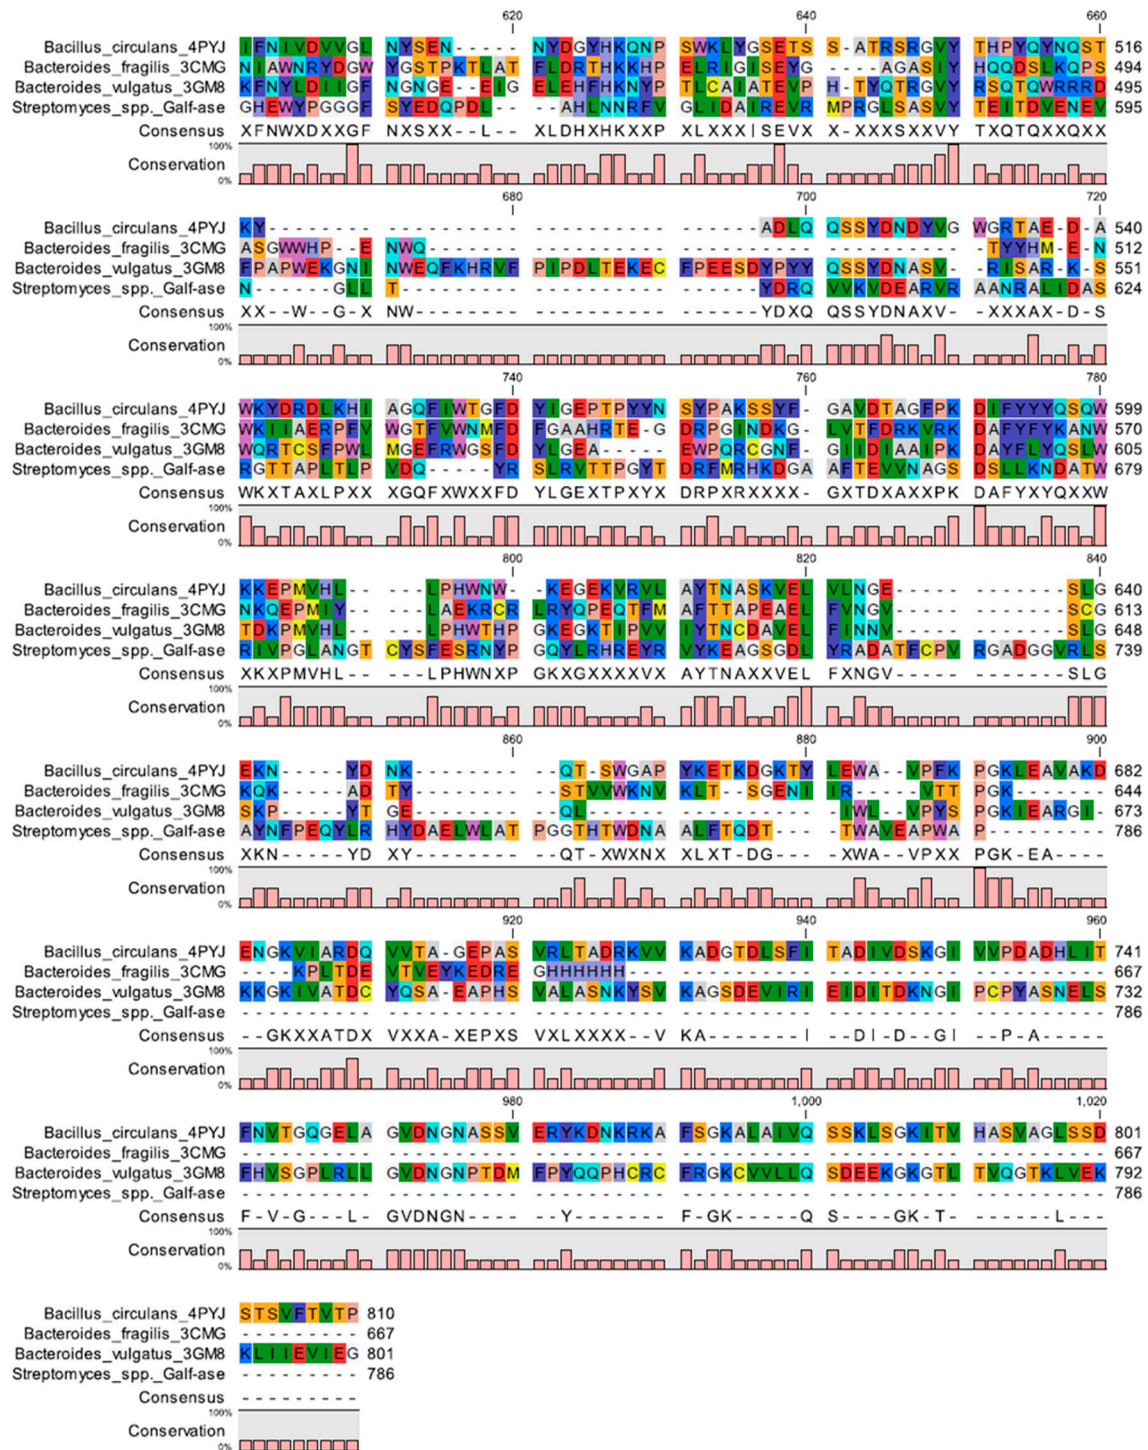

**Figure S3.** Alignment of complete ORF Galf-ase (*Streptomyces* spp.) amino acid sequence and of its homologs.

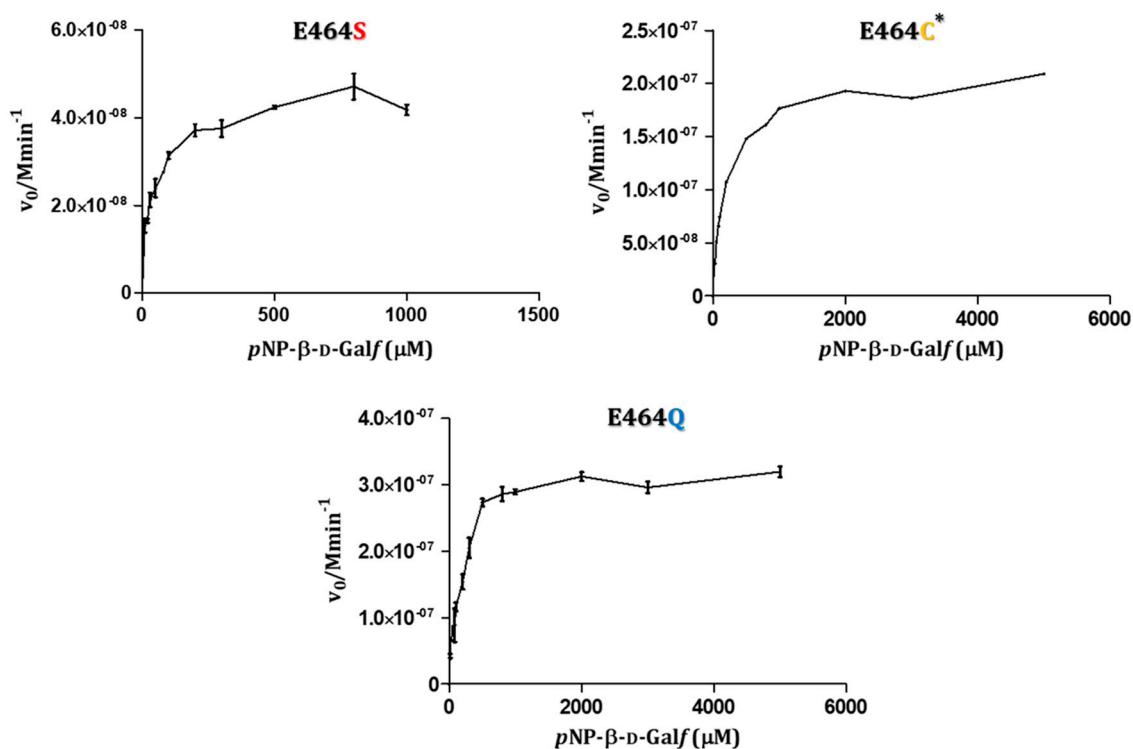

**Figure S4.** Michaelis-Menten plot of *pNP-β-D-Galf* hydrolysis reaction catalysed by Galf-ase E464S, E464C<sub>z</sub> and E464Q mutant variants. Mean values and SD error bars were calculated from three independent experiments (\*except E464C) and from a single protein preparation.

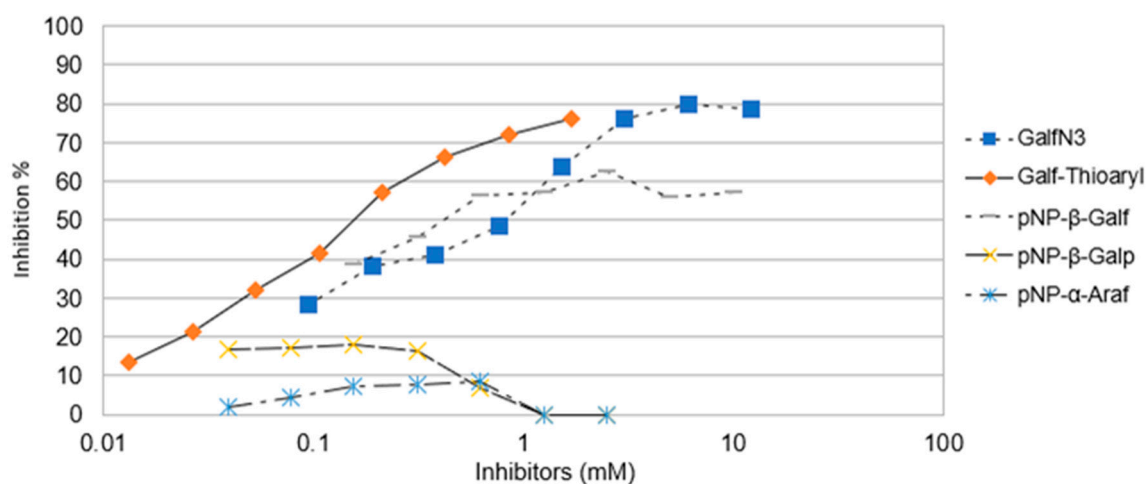

**Figure S5.** Inhibition profile of *pNP*-monosaccharides, Galf-N<sub>3</sub> and Galf-thioaryl with GalfNeoLect. Biotinylated GalfNGP (C=2μg/mL) was used as a tracer.

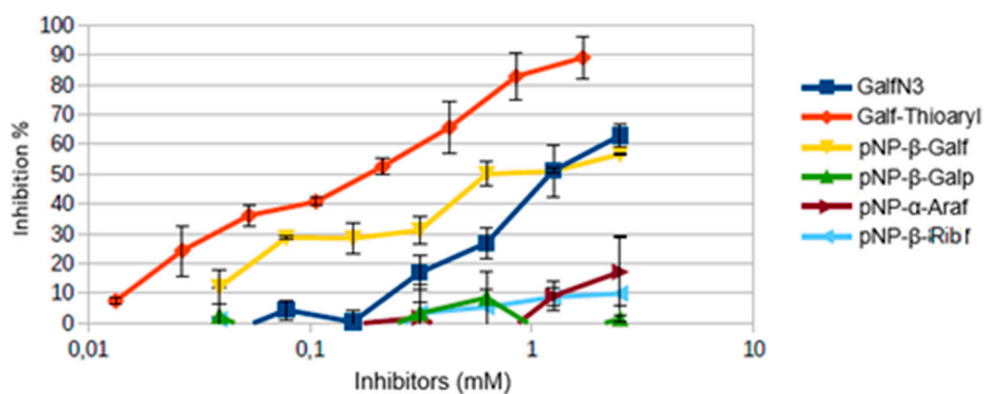

**Figure S6.** Inhibition profile of *pNP*-monosaccharides, *Galf-N<sub>3</sub>* and *Galf-thioaryl* with wild-type *Galf-ase*. Biotinylated *GalfNGP* ( $C=2\mu\text{g/mL}$ ) was used as a tracer.

**Table S1.** Direct binding assays values of different NGPs (*NeoGa*, *NeoF*, *NeoM*, *NeoaG* and *GalfNGP*, respectively) functionalised with  $\alpha$ -D-Galactose,  $\alpha$ -L-Fucose,  $\alpha$ -D-Mannose,  $\alpha$ -D-Glucose and *Galf*) to immobilized hIntL-1, wild-type *Galf-ase* *GalfNeoLect*.

| Proteins                  | NGPs           | Concentration ( $\mu\text{M}$ ) | Fluorescence intensity |
|---------------------------|----------------|---------------------------------|------------------------|
| Wild-type <i>Galf-ase</i> | <i>NeoGa</i>   | 0.5                             | 2029                   |
|                           | <i>NeoF</i>    | 0.5                             | 0                      |
|                           | <i>NeoM</i>    | 0.5                             | 0                      |
|                           | <i>NeoaG</i>   | 0.5                             | 2525                   |
|                           | <i>GalfNGP</i> | 0.13                            | 2800                   |
| <i>GalfNeoLect</i>        | <i>NeoGa</i>   | 0.5                             | 0                      |
|                           | <i>NeoF</i>    | 0.5                             | 1652                   |
|                           | <i>NeoM</i>    | 0.5                             | 1342                   |
|                           | <i>NeoaG</i>   | 0.5                             | 918                    |
|                           | <i>GalfNGP</i> | 0.13                            | 7691                   |
| hIntL-1                   | <i>NeoGa</i>   | 0.5                             | 742                    |
|                           | <i>NeoF</i>    | 0.5                             | 380                    |
|                           | <i>NeoM</i>    | 0.5                             | 65                     |
|                           | <i>NeoaG</i>   | 0.5                             | 125                    |
|                           | <i>GalfNGP</i> | 0.13                            | 17560                  |
